# Supplementary material for: Los toxicos que hay en los tejidos
Source: Royal Society of Chemistry journal article supplement (doi:10.1039/c1nr10179j), 2005-01-01
Supplement: c1nr10179j.pdf [file c1nr10179j.pdf]

## Electronic Supplementary Material

### Highly Depressed Temperature-induced Metal-insulator Transition in Synthetic Monodisperse 10-nm V<sub>2</sub>O<sub>3</sub> Pseudocubes Enclosed by {012} Facets

Yongfu Sun, Bingyan Qu, Shishi Jiang, Changzheng Wu, Bicao Pan, and Yi Xie\*

*Hefei National Laboratory for Physical Sciences at Microscale, University of Science & Technology of China, Hefei, 230026, P.R. China.*

#### S1. Experimental details for irregular V<sub>2</sub>O<sub>3</sub> particles with sizes ranging from 10 nm to 2 μm

*Preparation of 10-nm irregular rhombohedral V<sub>2</sub>O<sub>3</sub> nanoparticles:* 66 mg VO(acac)<sub>2</sub> was added into a solution of 4 mL benzyl alcohol and 4 mL oleylamine. After vigorous stirring for 30 min, the mixture was transferred into a 10 mL Teflon-lined autoclave, sealed and heated at 220 °C for 48 h. After cooling to room temperature naturally, the final product was collected by centrifuging the mixture, washed with cyclohexane and absolute ethanol for many times, and then dried in vacuum overnight for further characterization.

*Preparation of 20-nm irregular rhombohedral V<sub>2</sub>O<sub>3</sub> nanoparticles:* 66 mg VO(acac)<sub>2</sub> was added into a solution of 7 mL benzyl alcohol and 1 mL oleylamine. After vigorous stirring for 30 min, the mixture was transferred into a 10 mL Teflon-lined autoclave, sealed and heated at 220 °C for 48 h. After cooling to room temperature naturally, the final product was collected by centrifuging the mixture, washed with cyclohexane and absolute ethanol for many times, and then dried in vacuum

overnight for further characterization.

*Preparation of 40-nm irregular rhombohedral  $V_2O_3$  nanoparticles:* 0.3 mL  $VO(OC_3H_7)_3$  was added into a solution of 4 mL benzyl alcohol and 4 mL oleylamine. After vigorous stirring for 30 min, the mixture was transferred into a 10 mL Teflon-lined autoclave, sealed and heated at 220 °C for 48 h. After cooling to room temperature naturally, the final product was collected by centrifuging the mixture, washed with cyclohexane and absolute ethanol for many times, and then dried in vacuum overnight for further characterization.

*Preparation of 170-nm irregular rhombohedral  $V_2O_3$  nanoparticles:* 0.1 mL  $VO(OC_3H_7)_3$  was added into a solution of 4 mL isopropanol and 4 mL oleic acid. After vigorous stirring for 30 min, the mixture was transferred into a 10 mL Teflon-lined autoclave, sealed and heated at 220 °C for 48 h. After cooling to room temperature naturally, the final product was collected by centrifuging the mixture, washed with cyclohexane and absolute ethanol for many times, and then dried in vacuum overnight for further characterization.

*Preparation of 2- $\mu\text{m}$  irregular rhombohedral  $V_2O_3$  particles:* 1.5 g  $V_2O_5$  and 0.96 g 1,6-diaminohexane were added into 35 ml distilled water. After vigorous stirring for 30 min, the mixture was transferred into a 40 mL Teflon-lined autoclave, sealed and heated at 250 °C for 48 h. After cooling to room temperature naturally, the final product was collected by centrifuging the mixture, washed with distilled water and absolute ethanol for several times, and then dried in vacuum overnight for further characterization.[1]

In order to precisely illustrate the particle size deviation for these synthesized  $V_2O_3$  samples, the standard deviations ( $\sigma$ ) were calculated for each sample to evaluate how widely spread the values in

the data were, on the basis of the following formula:

$$\sigma = \sqrt{\frac{1}{N} \sum_{i=1}^N x_i^2 - \bar{x}^2}$$

Where  $x_i$  is the particle diameter directly measured from the corresponding TEM images,  $\bar{x}$  is the average particle diameter of all the measured particle diameters, and  $N$  is the particle number. The size deviations for the 10 nm  $\text{V}_2\text{O}_3$  pseudocubes and the irregular  $\text{V}_2\text{O}_3$  particles with size of 10 nm, 20 nm, 40 nm, 170 nm and 2  $\mu\text{m}$  were 1.2, 3.3, 5.3, 10, 11 and 20, respectively.

## S2. Structural analysis for rhombohedral and monoclinic $\text{V}_2\text{O}_3$

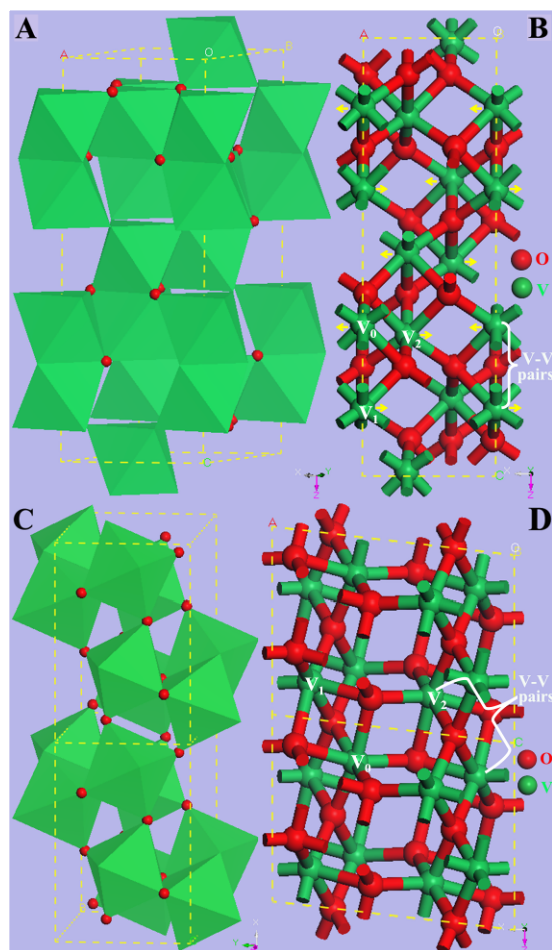

**Figure S1.** (A, B) Crystal structure for rhombohedral  $V_2O_3$ ; the arrows in (B) indicate the translation direction of the V-V pairs at the metal-insulator transition. (C, D) Crystal structure for monoclinic  $V_2O_3$ ; the brackets in (B, D) show the V-V pairs. The crystal structures of rhombohedral and monoclinic  $V_2O_3$  are simulated according to the crystallographic data of ICSD 201107 and ICSD 6286 given by the Inorganic Crystal Structure Database.

As clearly shown in Figures S1A and B, rhombohedral  $V_2O_3$  consists of V-V pairs through face-sharing O octahedrons along the Z axis. Such V-V pairs form chains through edge-sharing O octahedrons in the X-Z plane, which are further interconnected to form a three-dimensional framework (Figure 1B) [2, 3]. Notably, the rhombohedral structure of  $V_2O_3$  could be distorted to form monoclinic phase during cooling, which results in an expansion of the distance between V-V pairs. Specifically, in the phase transition from rhombohedral to monoclinic  $V_2O_3$  (Figures S1B and D), the  $V_0$ - $V_1$  distance across the face-sharing O octahedral increases from 2.669 Å to 2.744 Å. Meanwhile, the  $V_0$ - $V_2$  distance across the edge-sharing O octahedral increases from 2.868 Å to 2.984 Å, which is larger than the critical value of 2.94 Å calculated by Goodenough, thus breaking its 3-dimensional V-V framework into 2-dimensional V-V network (Figure 1B and D) [2-5]. In this case, the V3d electrons that originally itinerate along the V-V chains in the rhombohedral  $V_2O_3$  structure (Figure 1B) will be localized at individual V ions in monoclinic  $V_2O_3$  (Figure 1D), switching the  $V_2O_3$  material from metal to insulator state.

**S3. Characterizations for the monodisperse 10-nm  $V_2O_3$  pseudocubes with {012} facets exposed on surface**

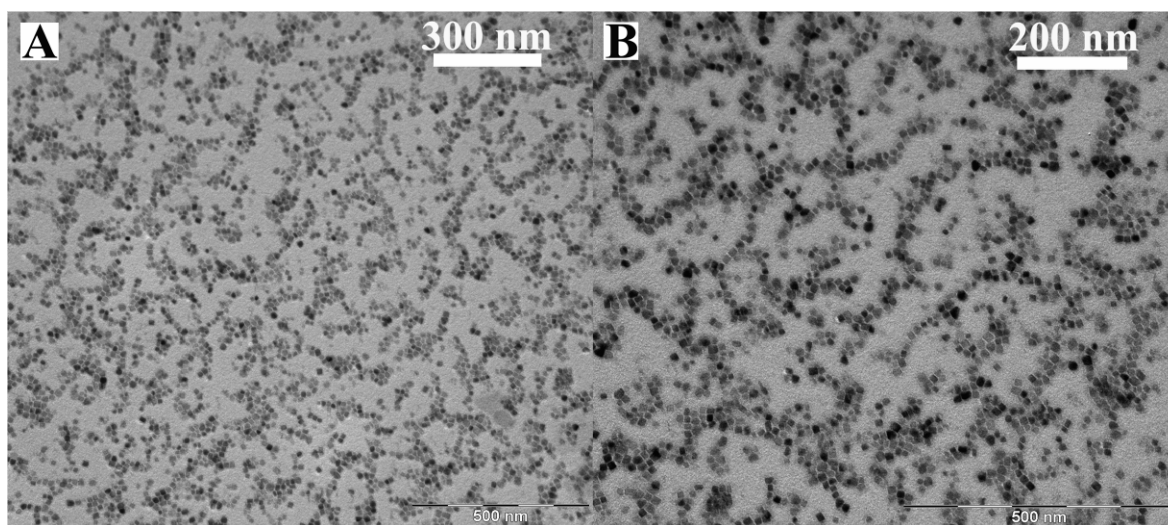

**Figure S2.** (A, B) TEM images of monodisperse 10-nm rhombohedral  $V_2O_3$  pseudocubes.

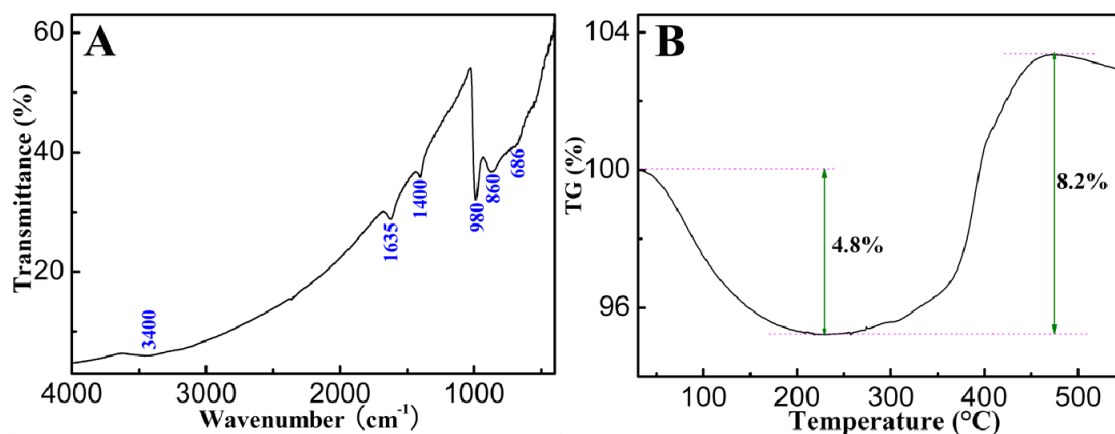

**Figure S3.** (A) FT-IR spectrum of the 10-nm rhombohedral  $V_2O_3$  pseudocubes; (B) the typical TGA curve of rhombohedral  $V_2O_3$  pseudocubes measured between 20 °C and 550 °C with a heating rate of 10 °C min<sup>-1</sup> in  $N_2$ .

The N-H mode of 1635  $cm^{-1}$  in FT-IR spectrum indicates that the 10-nm rhombohedral  $V_2O_3$  pseudocubes are capped with oleylamine.[6] The broad band at 3400  $cm^{-1}$  could be assigned to the adsorbed water. The 1400  $cm^{-1}$  and 686  $cm^{-1}$  belong to the C-H bending vibration. The band at 980  $cm^{-1}$  belongs to the stretching vibration of V=O in rhombohedral  $V_2O_3$ , while the peak at 860  $cm^{-1}$  could be assigned to its C-C vibration frequency.[7-9]

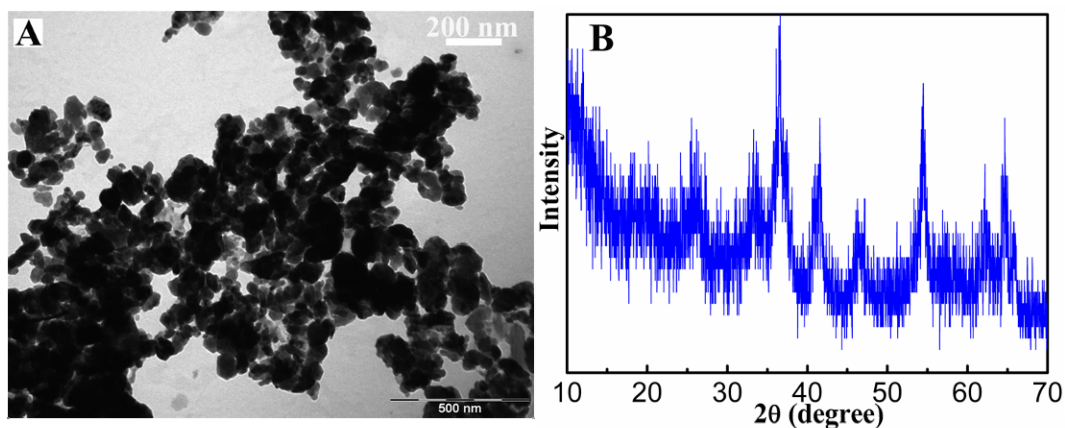

**Figure S4.** (A) TEM image of rhombohedral  $V_2O_3$  obtained in the sole solvent of benzyl alcohol and (B) the XRD pattern obtained in the sole solvent of oleylamine.

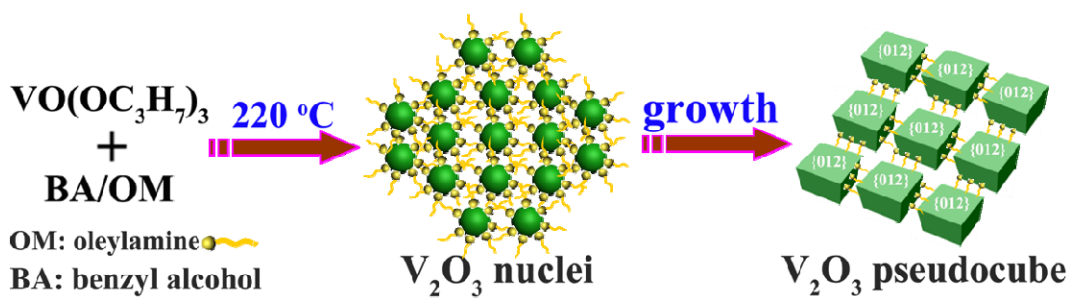

**Scheme S1.** Schematic illustration for the formation of monodisperse 10-nm rhombohedral  $V_2O_3$  pseudocubes with {012} facets exposed on surface.

**S4. Characterizations for irregular  $V_2O_3$  particles with average sizes of 10 nm, 20 nm, 40 nm, 170 nm and 2  $\mu\text{m}$**

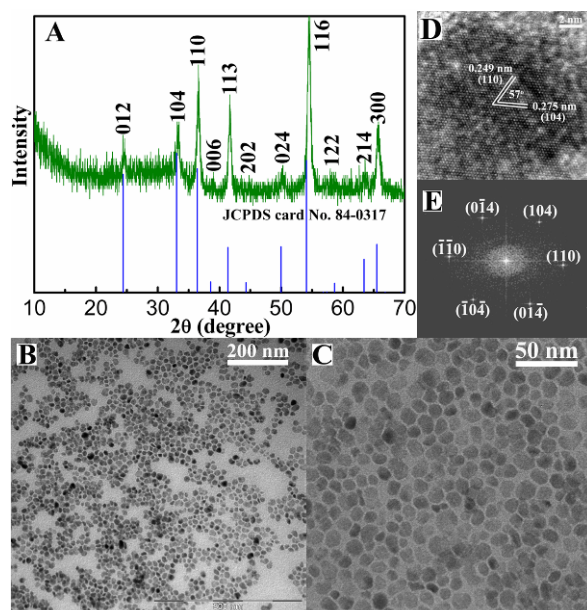

**Figure S6.** (A) XRD pattern and (B, C) TEM images of 10-nm irregular rhombohedral  $V_2O_5$  nanoparticles obtained at 220 °C for 48 h; (D) HRTEM image and (E) the corresponding fast Fourier transform image of a single rhombohedral  $V_2O_5$  nanoparticle. The panel A also shows the corresponding standard pattern of JCPDS card No. 84-0317.

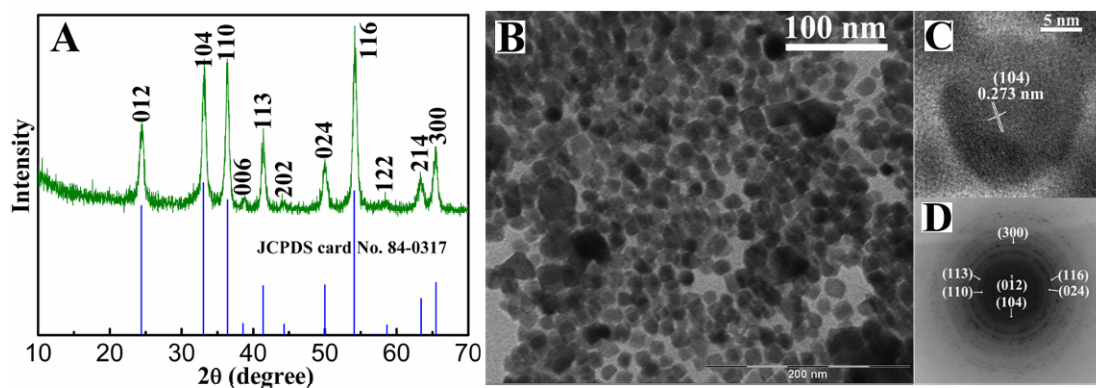

**Figure S7.** (A) XRD pattern, (B) TEM image, (C) HRTEM image and (D) selected-area electron diffraction pattern of 20-nm irregular rhombohedral  $V_2O_5$  nanoparticles obtained at 220 °C for 48 h. The panel A also shows the corresponding standard pattern of JCPDS card No. 84-0317.

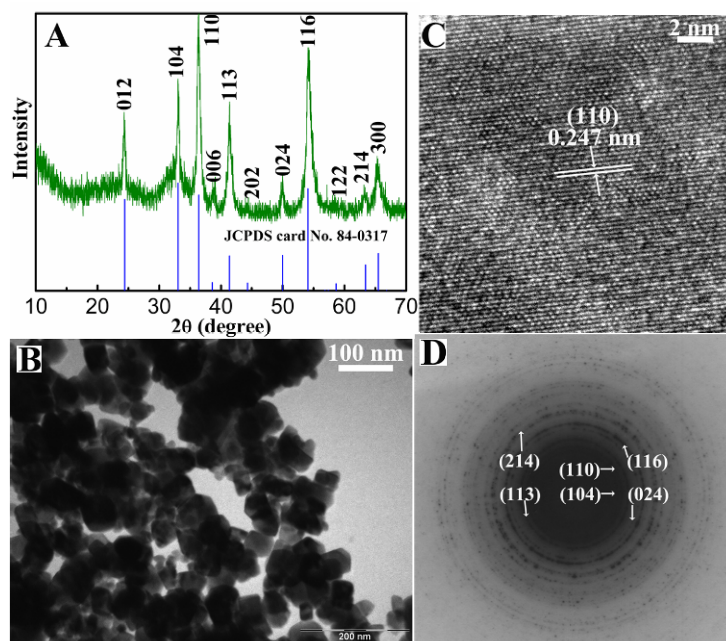

**Figure S8.** (A) XRD pattern, (B) TEM image, (C) HRTEM image and (D) selected-area electron diffraction pattern of 40-nm irregular rhombohedral  $V_2O_3$  nanoparticles obtained at 220 °C for 48 h. The panel A also shows the corresponding standard pattern of JCPDS card No. 84-0317.

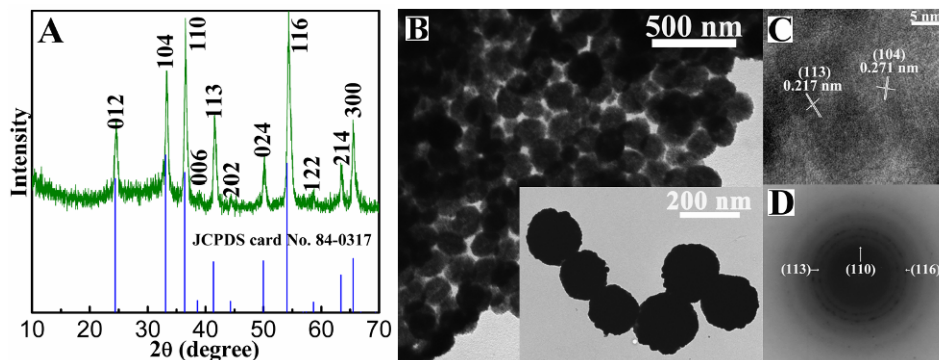

**Figure S9.** (A) XRD pattern, (B) TEM images, (C) HRTEM image and (D) selected-area electron diffraction pattern of 170-nm irregular rhombohedral  $V_2O_3$  nanoparticles obtained at 220 °C for 48 h. The panel A also shows the corresponding standard pattern of JCPDS card No. 84-0317.



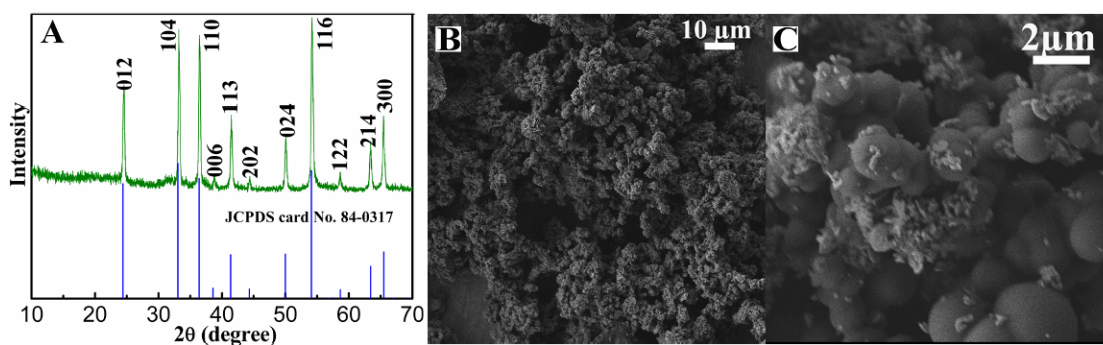

**Figure S10.** (A) XRD pattern, (B, C) SEM images of 2- $\mu\text{m}$  irregular rhombohedral  $\text{V}_2\text{O}_3$  particles obtained at 250 °C for 48 h. The panel A also shows the corresponding standard pattern of JCPDS card No. 84-0317.

## References

- [1] Sediri, F.; Hgarbi, N. *Mater. Sci. Eng., B* **2005**, *123*, 136-138.
- [2] H. Katzke, R. Schlögl, *Acta Cryst.* 2003, B59, 456-462.
- [3] Taylor, J. W.; Smith, T. J.; Andersen, K. H.; Capellmann, H.; Kremer, R. K.; Simon, A.; Schärpf, O.; Neumann, K. U.; Ziebeck, K. R. A. *Eur. Phys. J. B* **1999**, *12*, 199-207.
- [4] Dernier, P. D.; Marezio, M. *Phys. Rev. B*, **1970**, *2*, 3771-3776.
- [5] Goodenough, J. B. *Annu. Rev. Mater. Sci.* **1971**, *1*, 101-138.
- [6] Xu, X. G.; Wang, X. *Inorg. Chem.* **2009**, *48*, 3890.
- [7] Caravati, M.; Grunwaldt, J. D.; Baiker, A. *Phys. Chem. Chem. Phys.* **2005**, *7*, 278.
- [8] Boscencu, R.; Ilie, M.; Socoteanu, R.; Oliveira, A.; Constantin, S. C.; Neagu, M.; Manda, G.; Ferreira, L. F. V. *Molecules* **2010**, *15*, 3731.
- [9] Botto, I. L.; Vassallo, M. B.; Baran, E. J.; Minelli, G. M. *Chem. Phys.* **1997**, *50*, 267.
